# Supplementary material
Source: Springer Nature journal article supplement (https://www.springermedizin.de/resource/supplementary/13058_2011_2985_MOESM13_ESM.pdf/9703024)

## ER+PR+

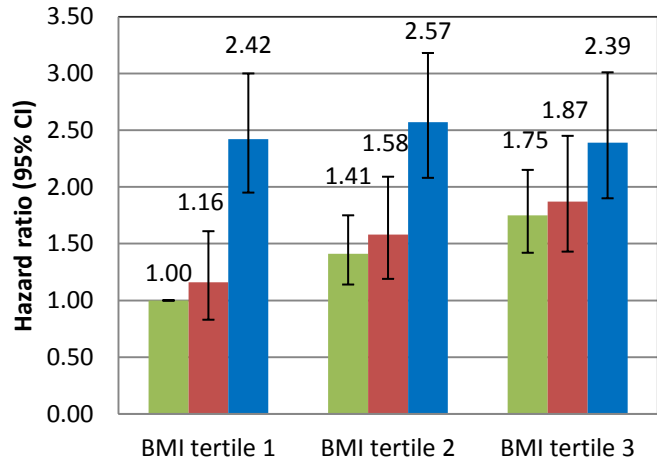

## ER-PR-

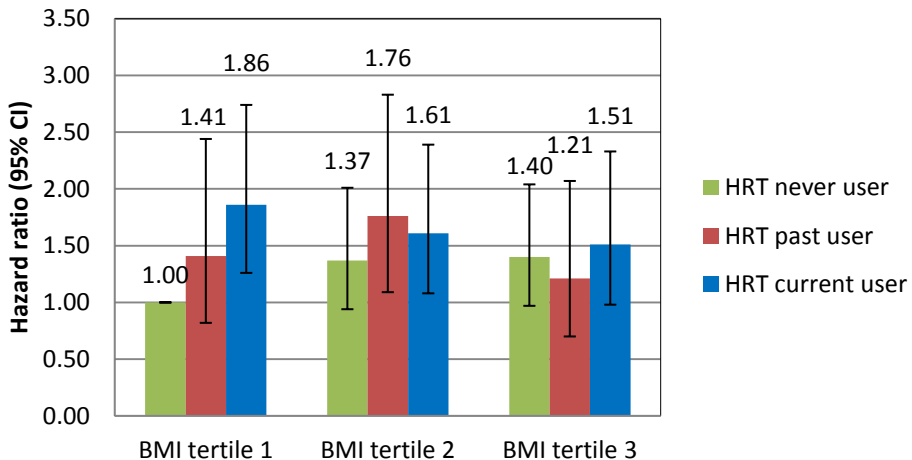

Supplement: MOESM13 [file 9703024]
